# Supplementary material for: Blastocyst quality and perinatal outcomes in women undergoing single blastocyst transfer in frozen cycles
Source: PubMed Central journal article supplement — Hum Reprod Open. 2021 Oct 30;2021(4):hoab036. doi: 10.1093/hropen/hoab036 (PMC8849119; doi:10.1093/hropen/hoab036), 2021-10-30
Supplement: hoab036_Supplementary_Fig1.pdf [file hoab036_Supplementary_Fig1.pdf]

27,336 cycles underwent frozen-thawed SBT cycles

6,032 repeated cycles  
2,439 women with PGT cycles  
390 unclear record of blastocyst quality  
134 women with embryo vitrified at the cleavage stage

18,341 women with eligible SBT cycles

10,548 women with failed cycles  
209 loss of follow-up

7,584 women resulted in live birth

105 twin deliveries  
3 neonatal death  
7 stillbirths

7,469 women eligible for final analysis
